# Supplementary material
Source: Springer Nature journal article supplement (https://www.springermedizin.de/resource/supplementary/13049_2011_290_MOESM6_ESM.pdf/9666272)

Mean total length of ED stay  
(hh:mm)

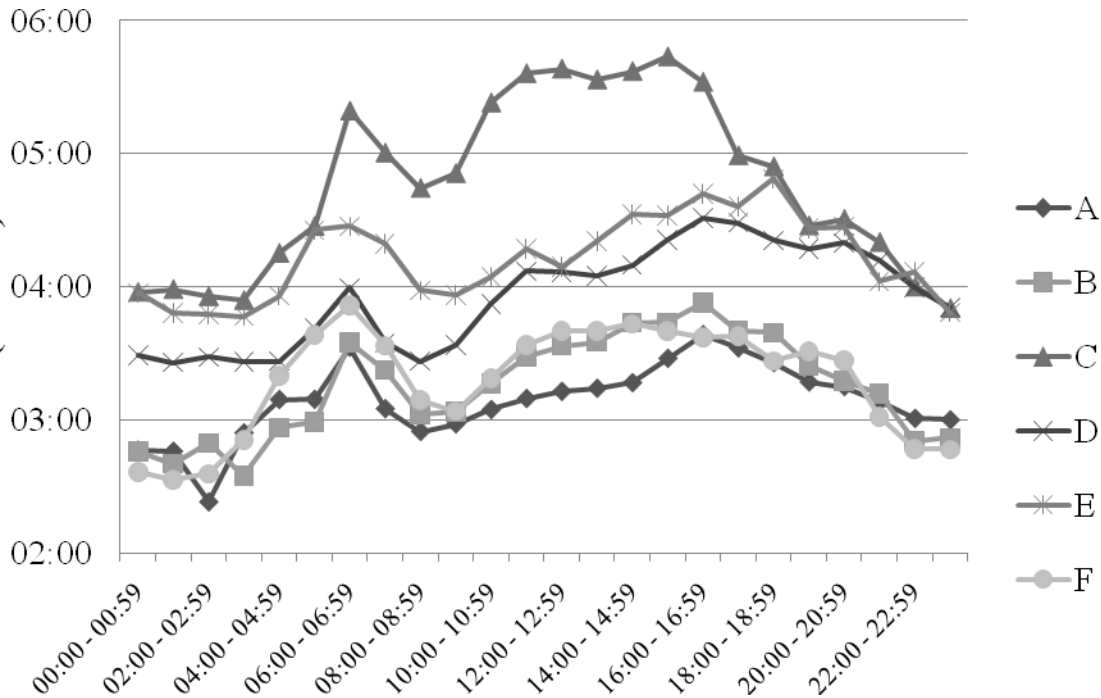

Supplement: MOESM6 [file 9666272]
